# Supplementary material for: An engineered opsin monomer scrambles phospholipids
Source: PubMed Central journal article supplement (PMC5711885; doi:10.1038/s41598-017-16842-z), 2017-12-01
Supplement: 41598_2017_16842_MOESM1_ESM.pdf [file 41598_2017_16842_MOESM1_ESM.pdf]

## Supplementary Information

An engineered opsin monomer scrambles phospholipids

Kalpana Pandey<sup>#1</sup>, Birgit Ploier<sup>#1</sup>, Michael A. Goren<sup>#1</sup>, Joshua Levitz<sup>‡</sup>, George Khelashvili<sup>‡#</sup>, and Anant K. Menon<sup>#\*</sup>

<sup>#</sup> Department of Biochemistry, Weill Cornell Medical College, 1300 York Avenue, New York, NY 10065, USA

<sup>†</sup> Department of Physiology and Biophysics, Weill Cornell Medical College, 1300 York Avenue, New York, NY 10065, USA

<sup>‡</sup> Institute for Computational Biomedicine, Weill Cornell Medical College, 1300 York Avenue, New York, NY 10065, USA

\* To whom correspondence should be addressed: Prof. Anant K. Menon, Department of Biochemistry, Weill Cornell Medical College, 1300 York Avenue, New York, NY, 10065, USA; Telephone +1-646-962-2476; E-mail: [akm2003@med.cornell.edu](mailto:akm2003@med.cornell.edu)

<sup>1</sup>These authors contributed equally to this work

## Supplementary Figure S1

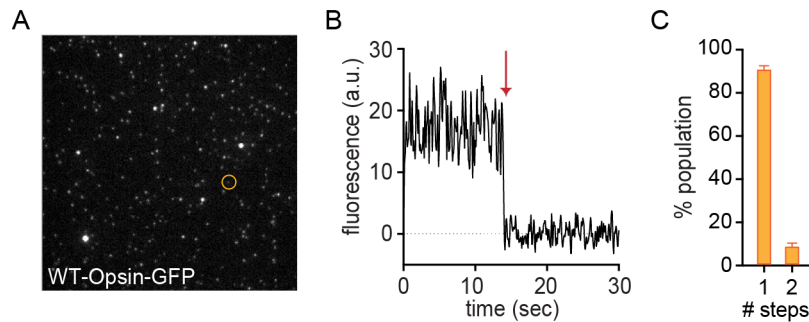

### Supplementary Figure S1.

#### Single molecule photobleaching analysis of WT-Opsin-GFP.

WT-Opsin-GFP was expressed in HEK293T cells, extracted with 0.1% (w/v) DDM and tethered to a passivated glass slide using a biotinylated anti-GFP antibody. **(A)**. Representative TIRF image of the sample showing distribution of spots. Panel B shows photobleaching of the spot circled in orange. **(B)**. Representative trace showing single step photobleaching of a WT-Opsin-GFP molecule (corresponding to the circled spot in panel A). **(C)** Graph showing the fractional distribution of WT-Opsin-GFP molecules undergoing 1- and 2-step photobleaching in response to 488 nm illumination. 971 molecules were analyzed, 883 of which were bleached in a single step as shown in panel B. Error bars are standard errors calculated from 4 movies (>200 spots were analyzed per movie).

## Supplementary Figure S2

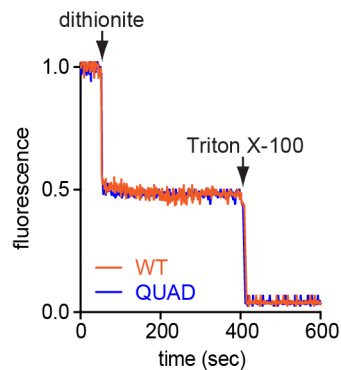

### Supplementary Figure S2.

#### Reconstituted vesicles protect encapsulated NBD-glucose from dithionite.

2-NBD-Glucose (10  $\mu$ M final concentration) and WT-opsin or QUAD opsin were added to DDM-destabilized vesicles and the samples were treated with BioBeads to reconstitute proteoliposomes containing encapsulated NBD-Glucose (PPR~1.1 mg/mmol (WT-opsin) and 0.45 mg/mmol (QUAD-opsin)). Fluorescence was recorded using the same settings as for NBD-PC (see Methods) and dithionite was added as indicated. For both WT-opsin and QUAD-opsin reconstituted samples, dithionite addition resulted in a sharp drop in fluorescence followed by a steady signal, indicating reduction of extravesicular NBD-Glucose and protection of the encapsulated pool. The extent of reduction was not as great as expected because of significant adsorption of NBD-Glucose to the BioBeads. Subsequent addition of Triton X-100 to disrupt the membrane barrier eliminated fluorescence. Thus, dithionite cannot cross the membrane of reconstituted vesicles to reduce trapped NBD-Glucose.
